# Supplementary material for: Resveratrol Affects Insulin Signaling in Type 2 Diabetic Goto-Kakizaki Rats
Source: MDPI journal article supplement (doi:10.3390/ijms22052469), 2021-02-28

# Figure S1: IR (muscle)

The red frames on photos below indicate the 3 representatives of each group of rats, which are presented on figure 2C in the article.

SDC

GKC

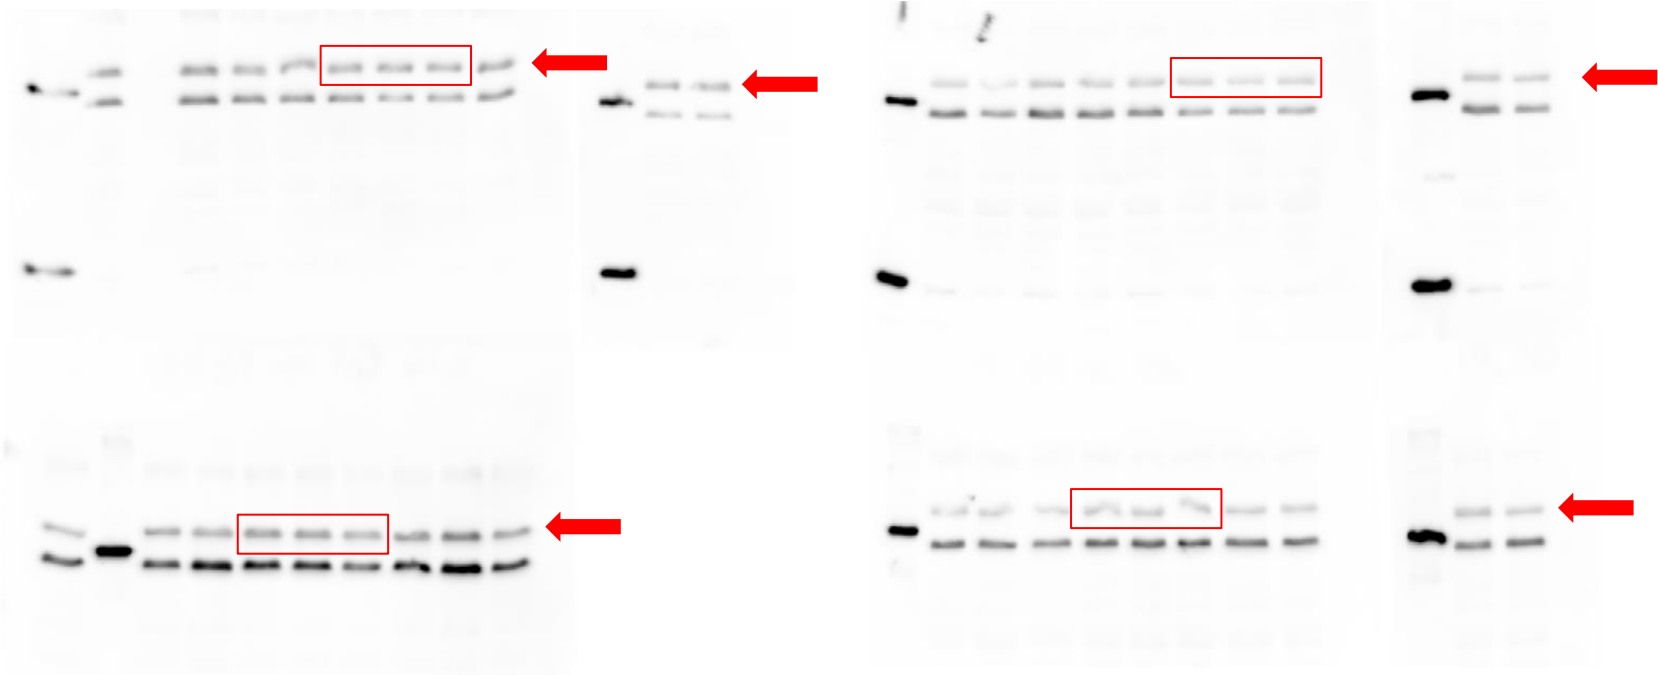

SDR

GKR

# pIR (muscle)

SDC

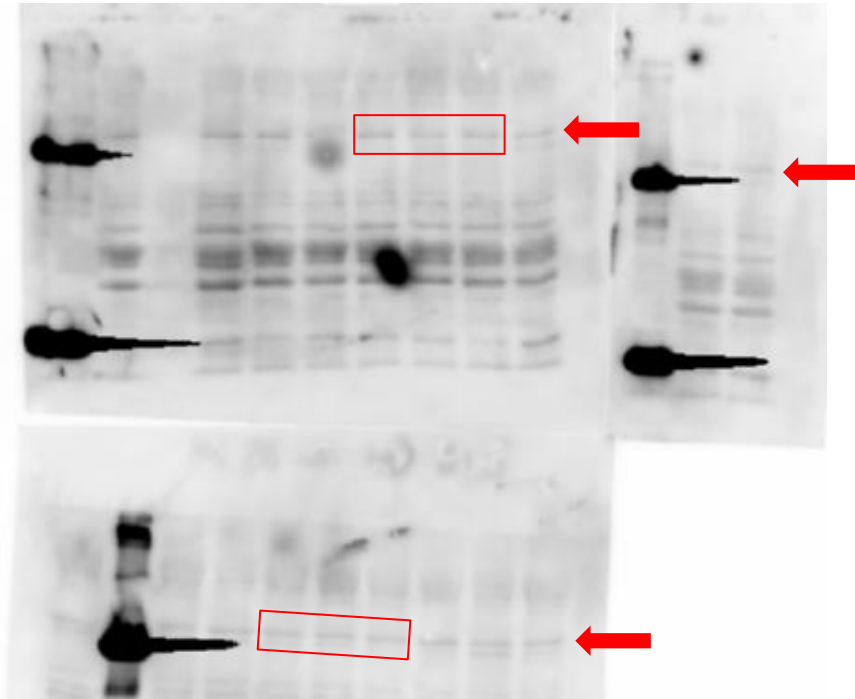

SDR

GKC

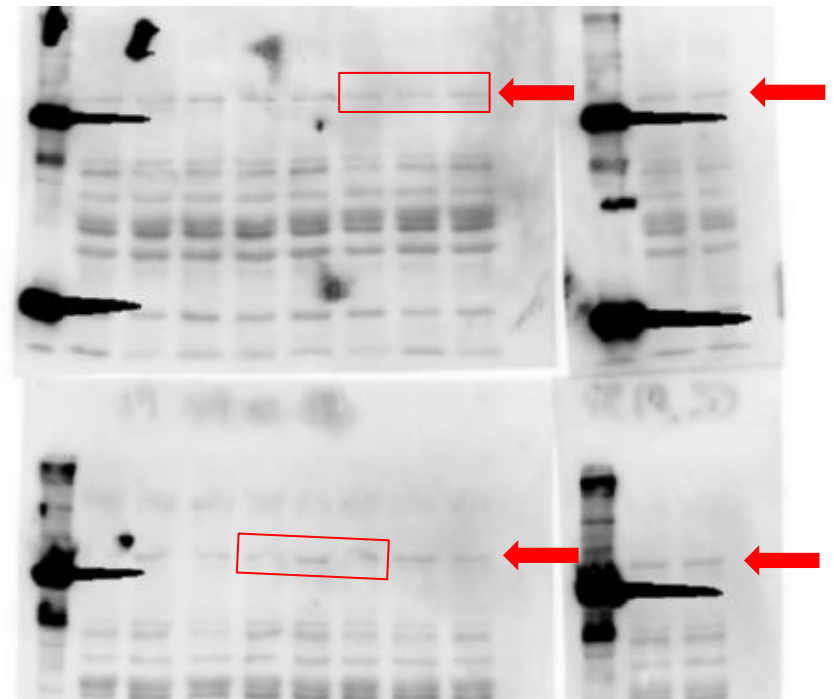

GKR

# GAPDH (muscle)

SDC

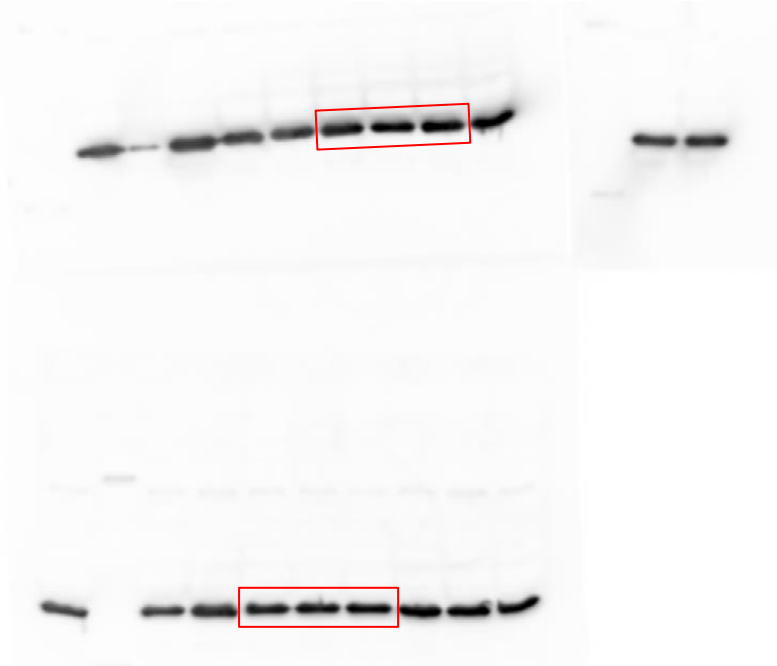

GKC

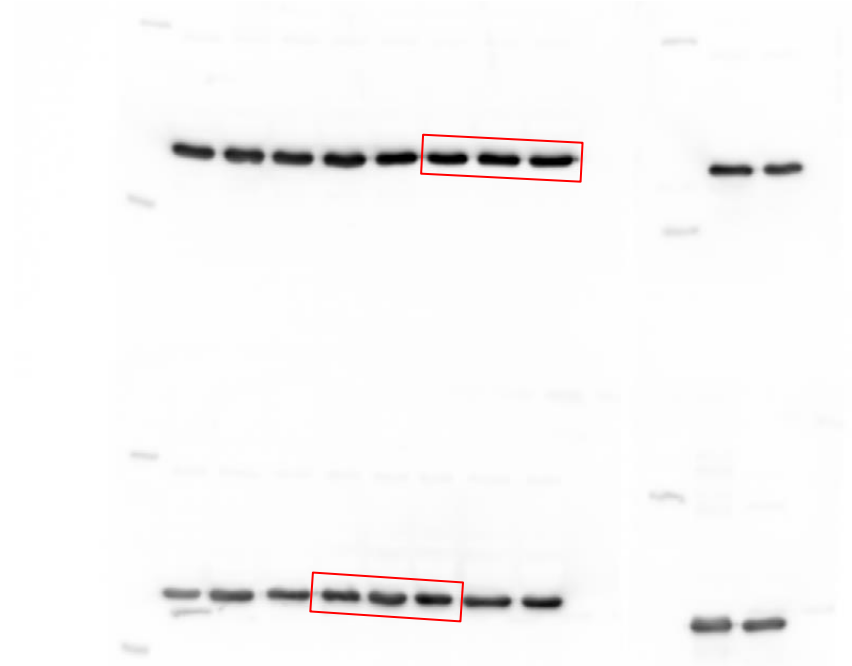

SDR

GKR

## Figure S2:

## IR (liver)

The red frames on photos below indicate the 3 representatives of each group of rats, which are presented on figure 3B in the article.

**SDC**

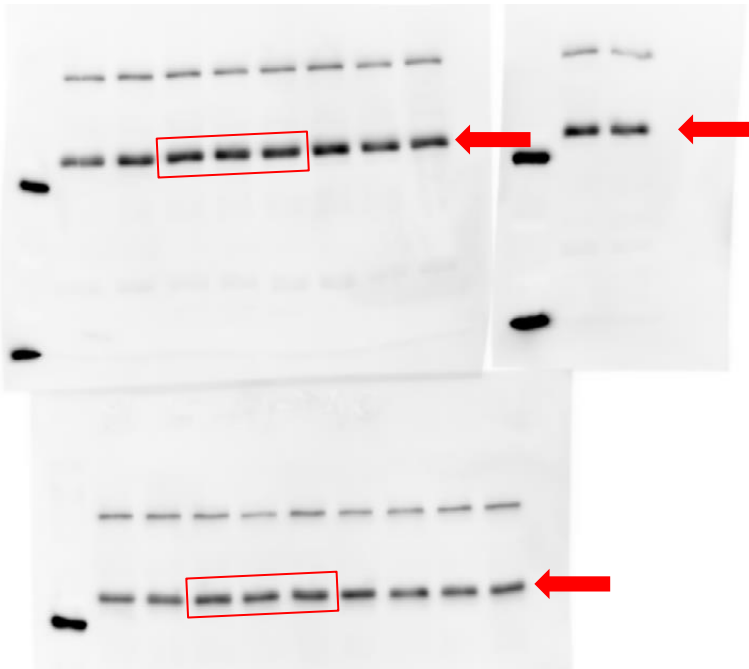

**GKC**

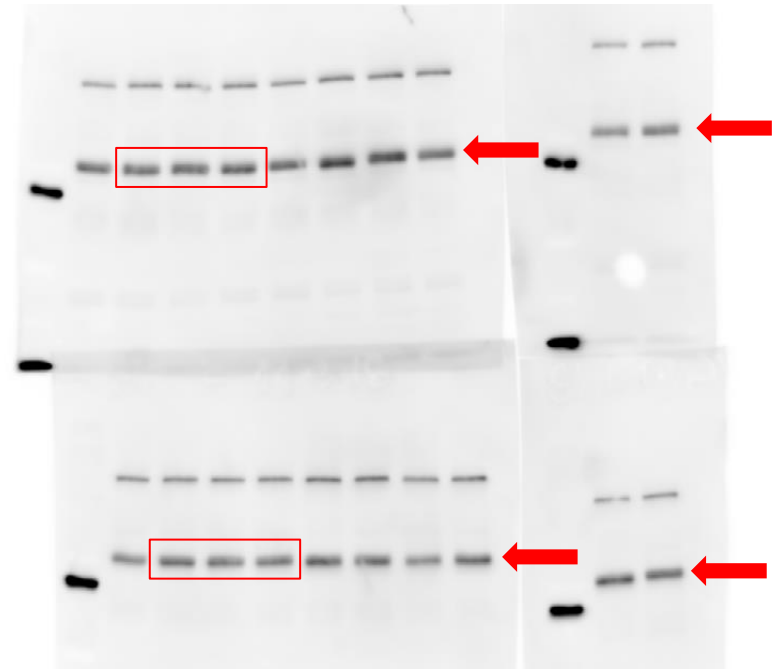

**SDR**

**GKR**

# $\beta$ actin (liver)

SDC

GKC

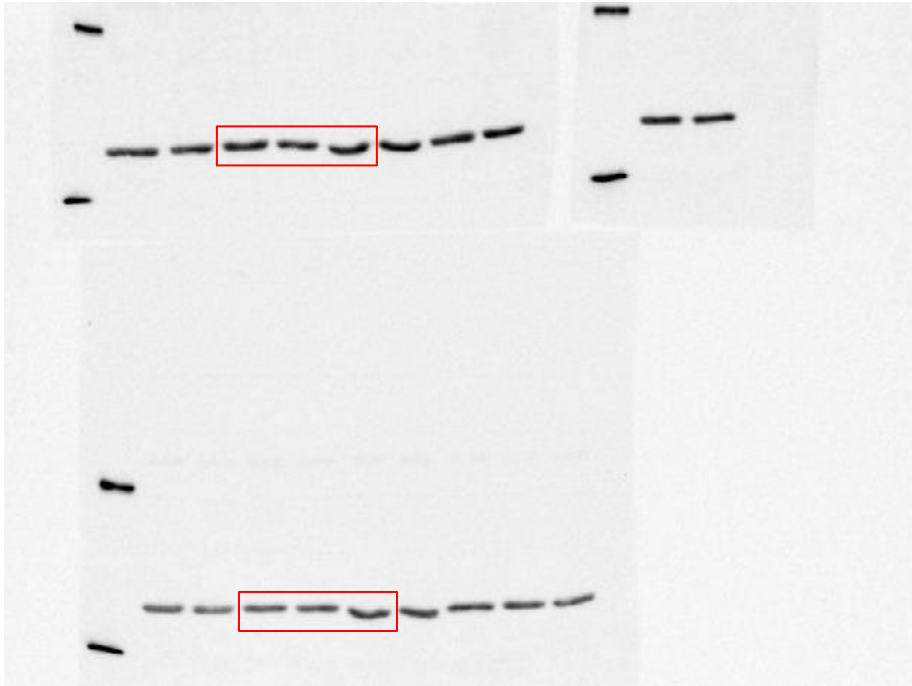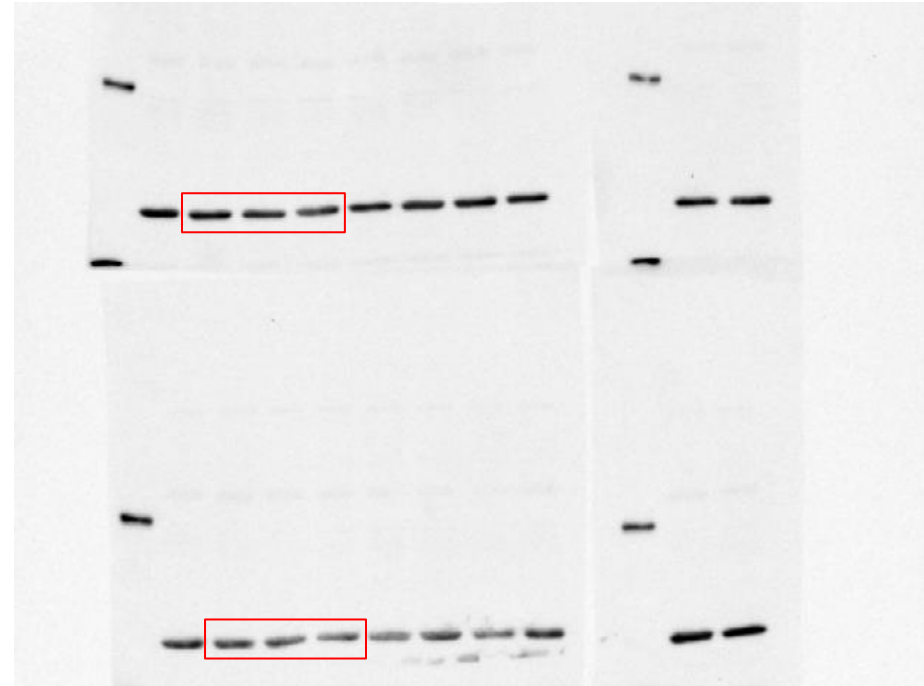

SDR

GKR

## Figure S3A:

## Tug (muscle)

The red frames on photos below indicate the 3 representatives of each group of rats, which are presented on figure 4E in the article.

**SDC**

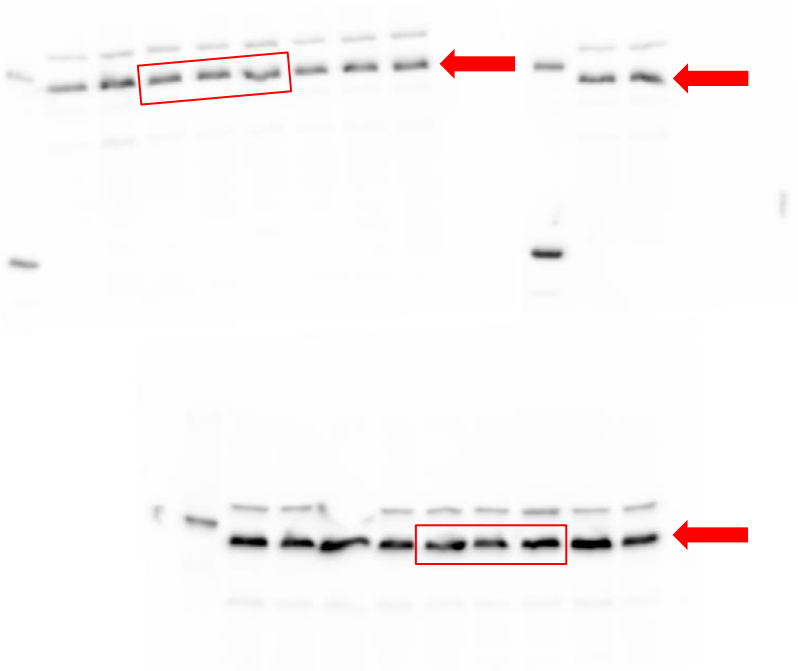

**GKC**

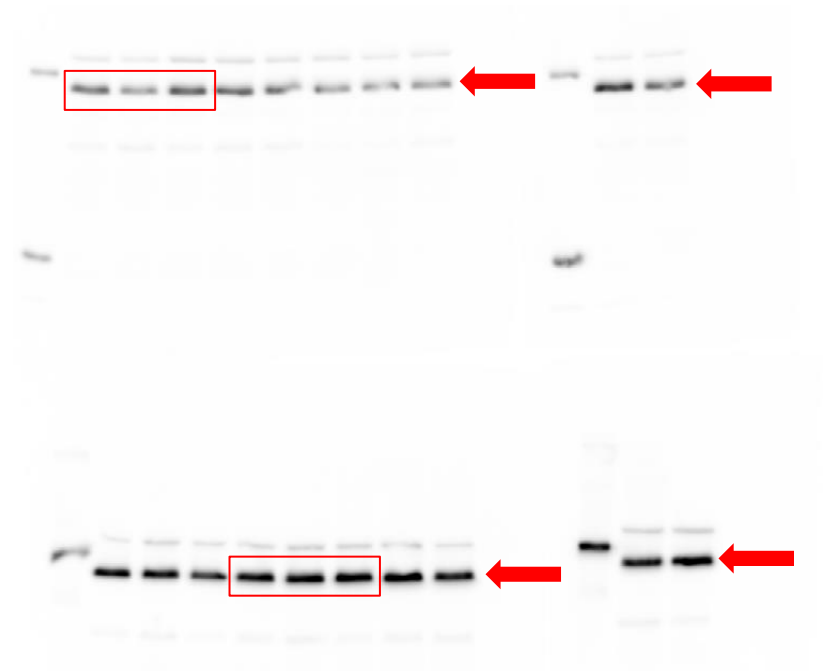

**SDR**

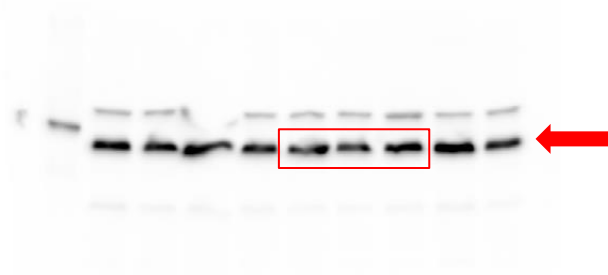

**GKR**

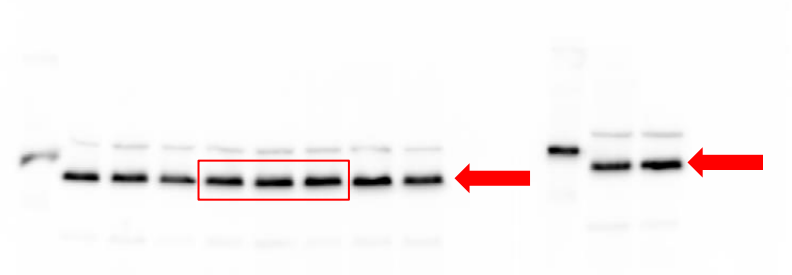

# Glut4 (muscle)

SDC

GKC

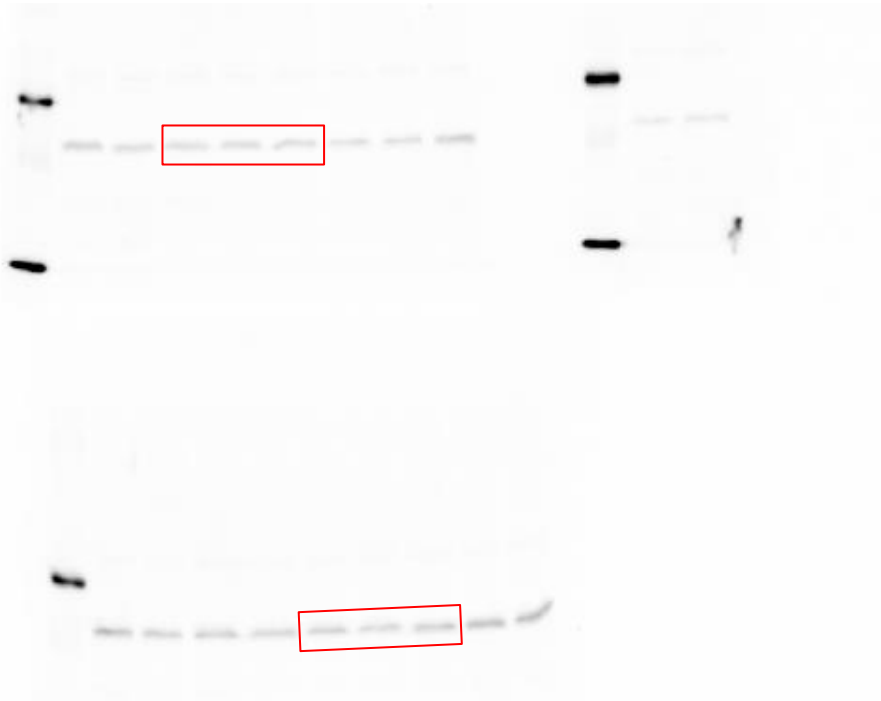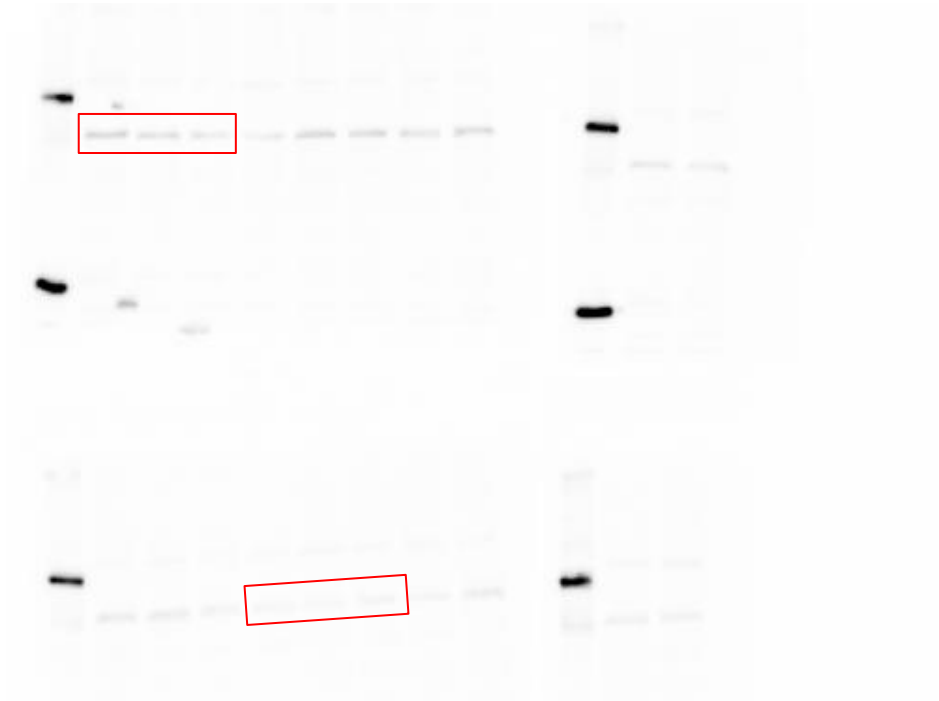

SDR

GKR

# GAPDH (muscle)

SDC

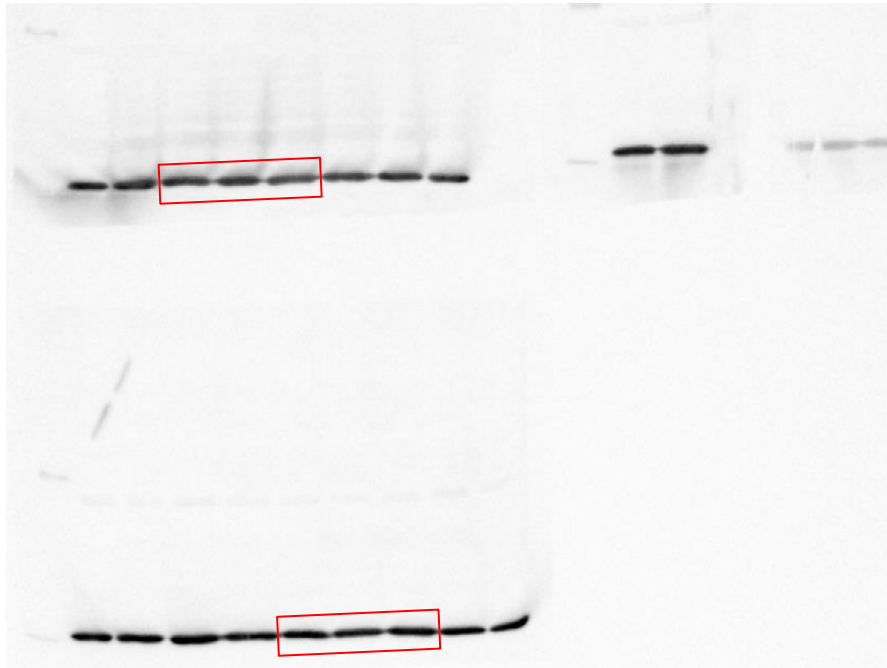

SDR

GKC

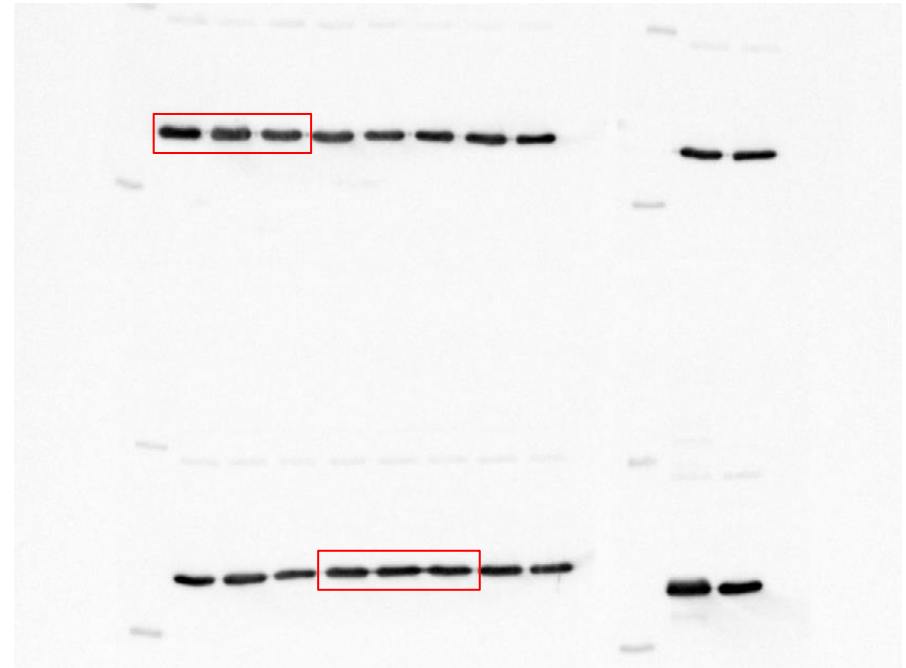



## Figure S3B:

## Tug (fat)

The red frames on photos below indicate the 3 representatives of each group of rats, which are presented on figure 4F in the article.

**SDC**

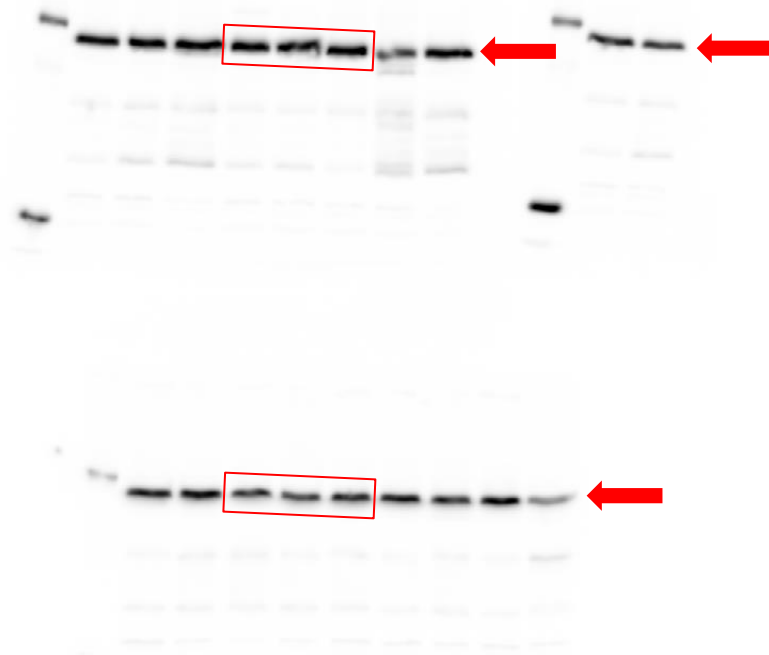

**SDR**

**GKC**

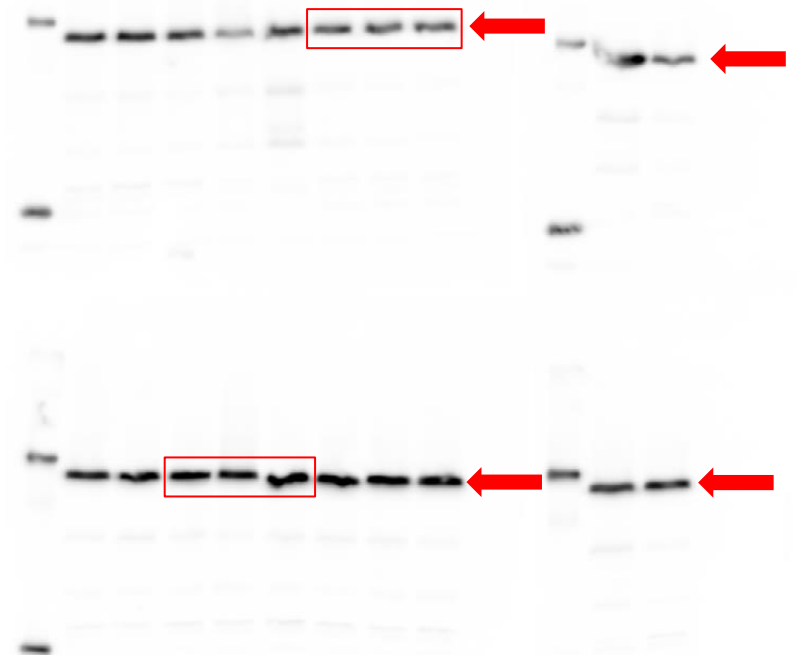

**GKR**

# Glut4 (fat)

SDC

GKC

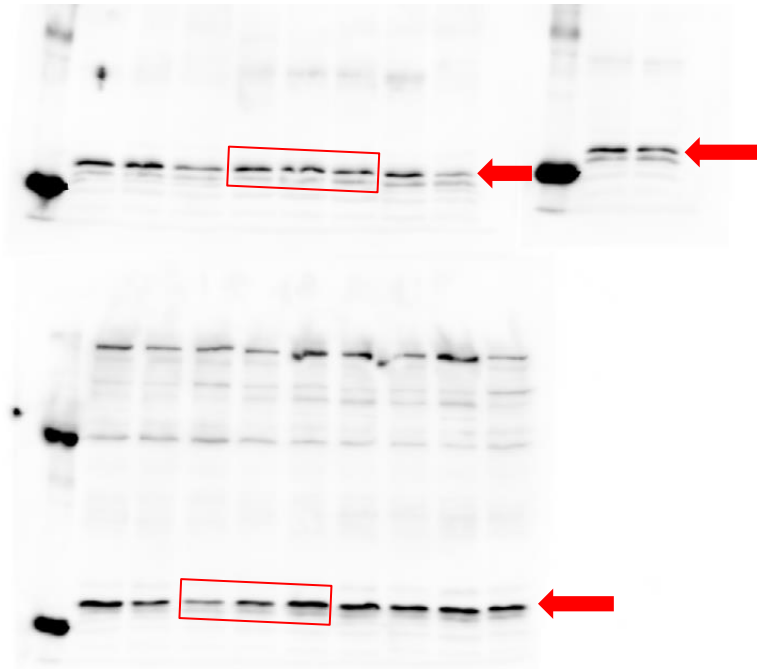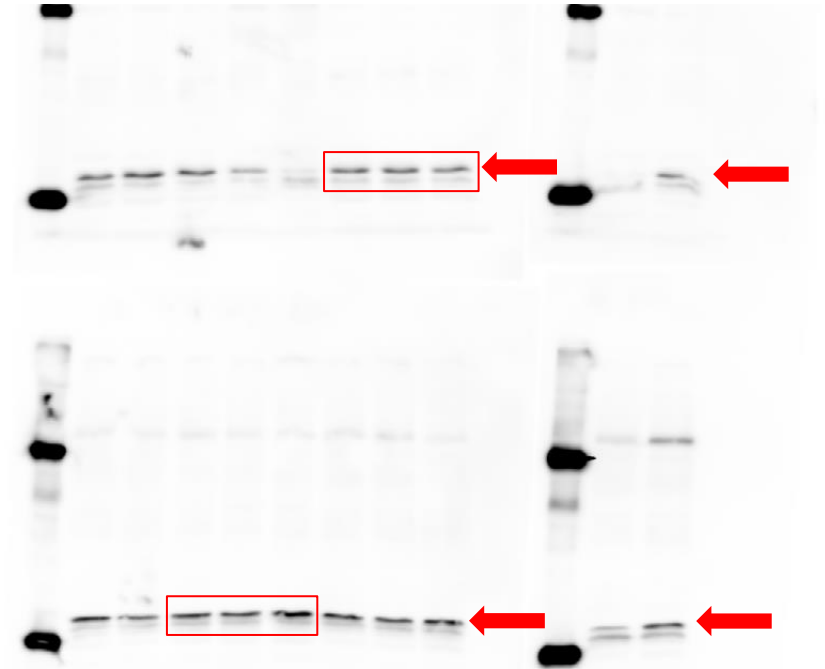

SDR

GKR

# $\beta$ actin (fat)

SDC

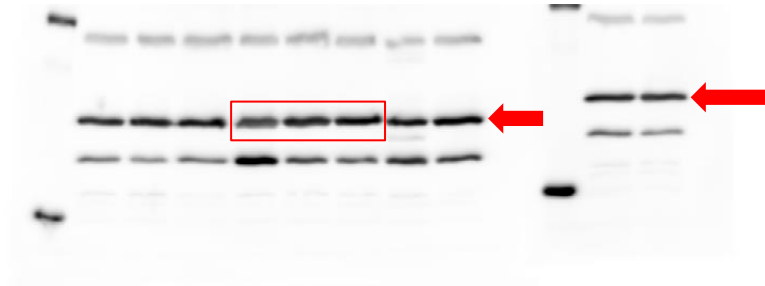

GKC

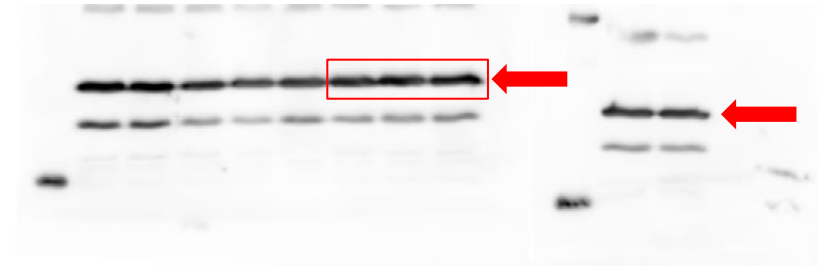

SDR

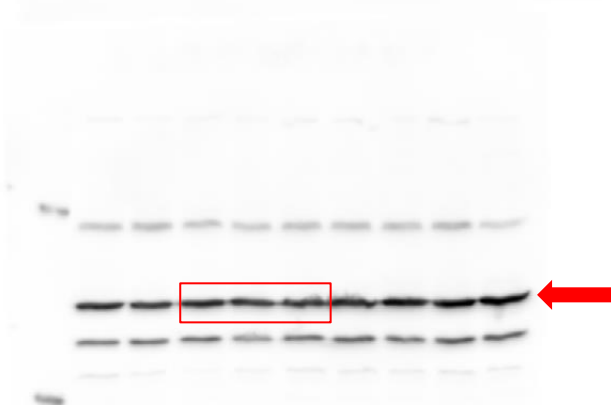

GKR

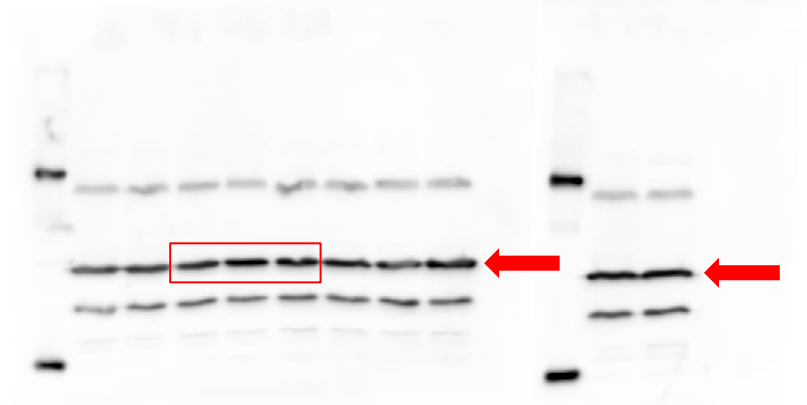

Supplement: s1 [file s1]
